# Supplementary material for: Click on silica: systematic immobilization of Co(ii) Schiff bases to the mesoporous silica via click reaction and their catalytic activity for aerobic oxidation of alcohols
Source: Royal Society of Chemistry journal article supplement (doi:10.1039/c0dt00208a), 2010-01-01

## Supporting Figure 1: IR-Spectra of azido-functionalized mesoporous silica support 4

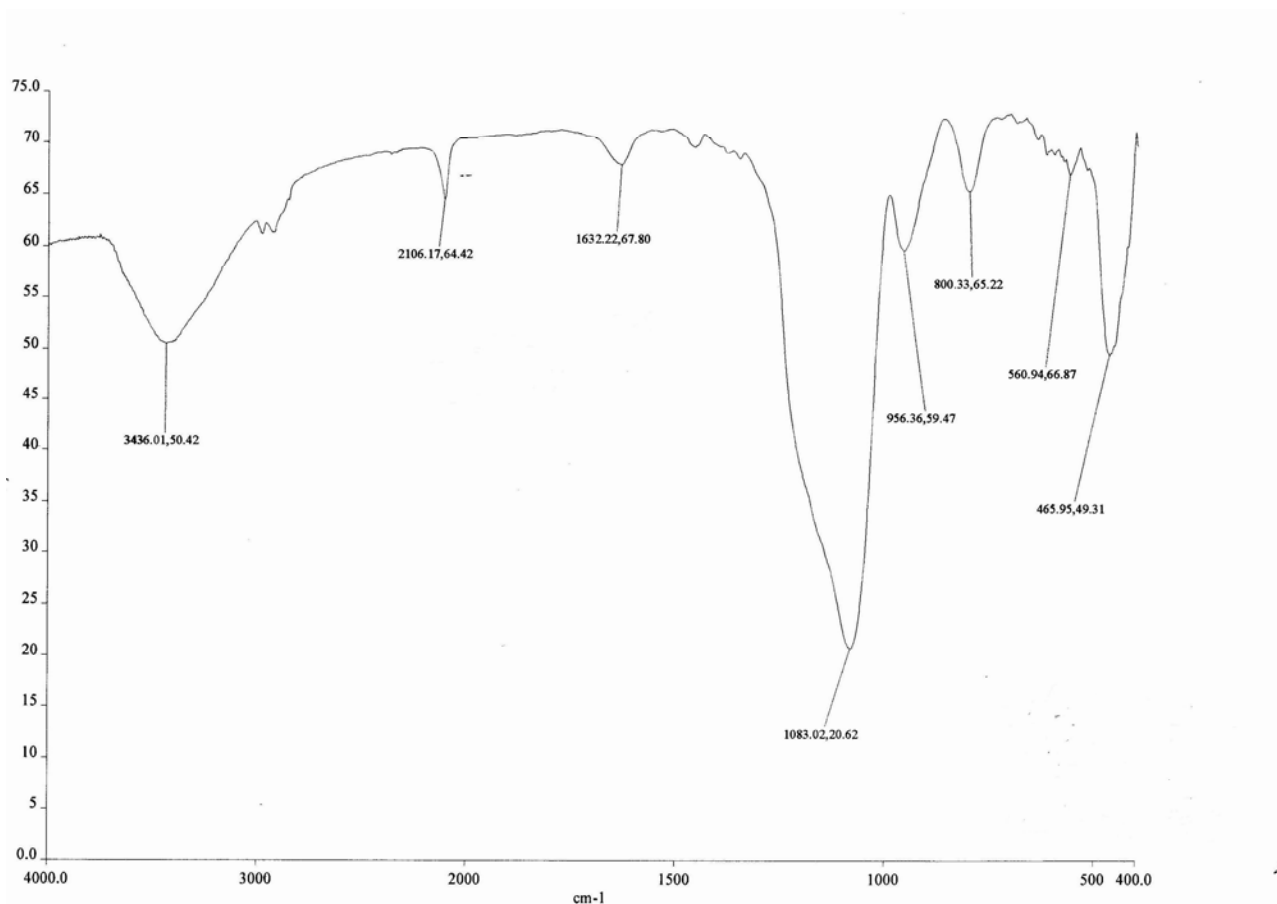

## Supporting Figure 2: IR Spectra of silica immobilized Schiff base 5

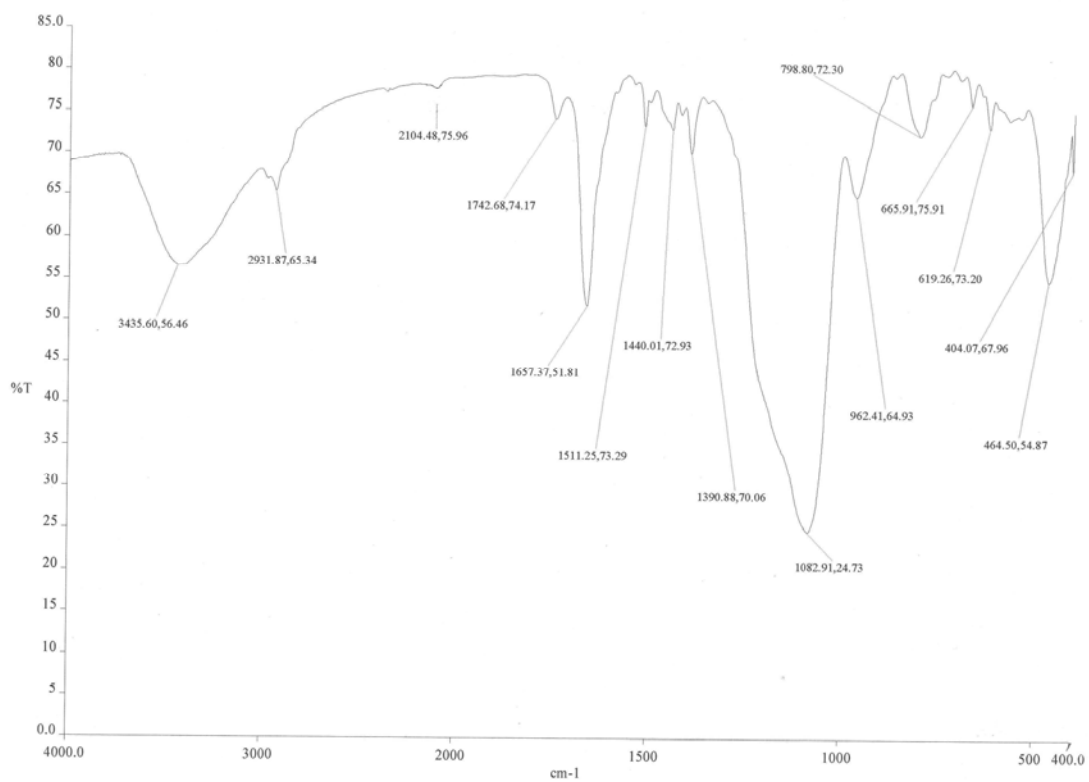

### Supporting Figure 4: IR Spectra of (SBA-click-Co Schiff base IA) 7

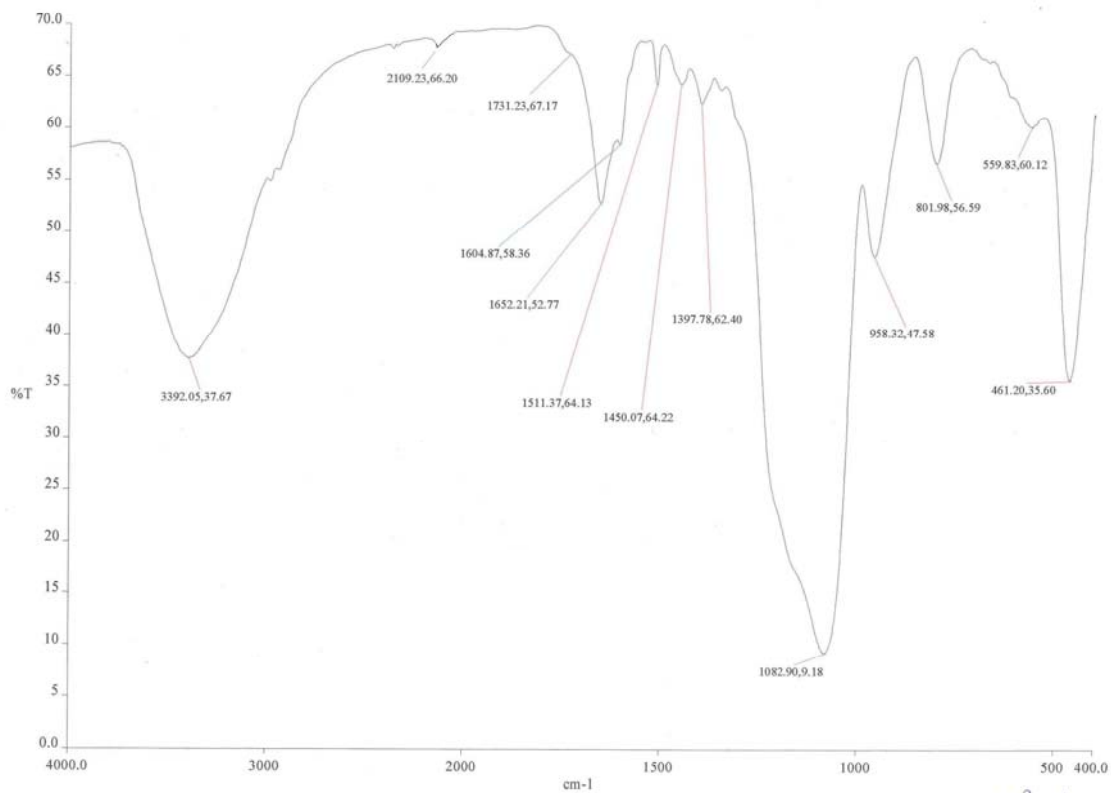

IR Spectra No- 346  
analysis. S.M. 2/12/18  
el. Lib.

### Supporting Figure 4: IR Spectra of (SBA-click-Co Schiff base IB) 7

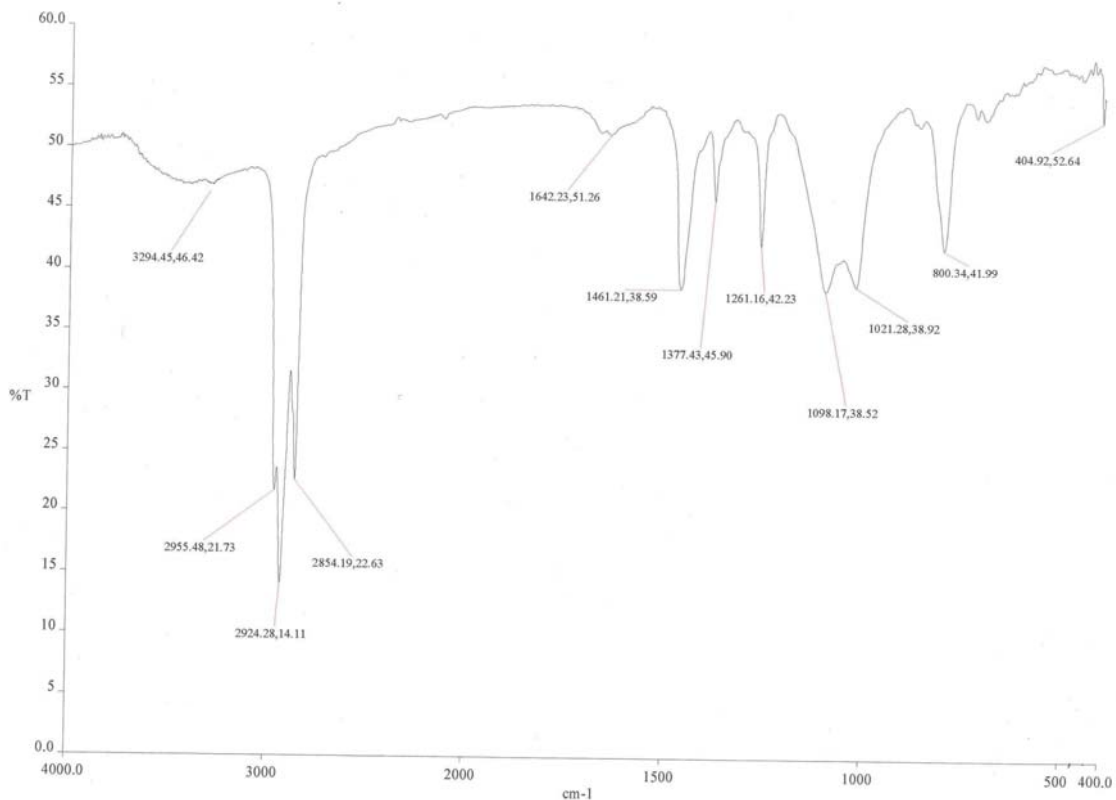

## Supporting Figure 5: IR Spectra of (SBA-click-Co Schiff base II) 11

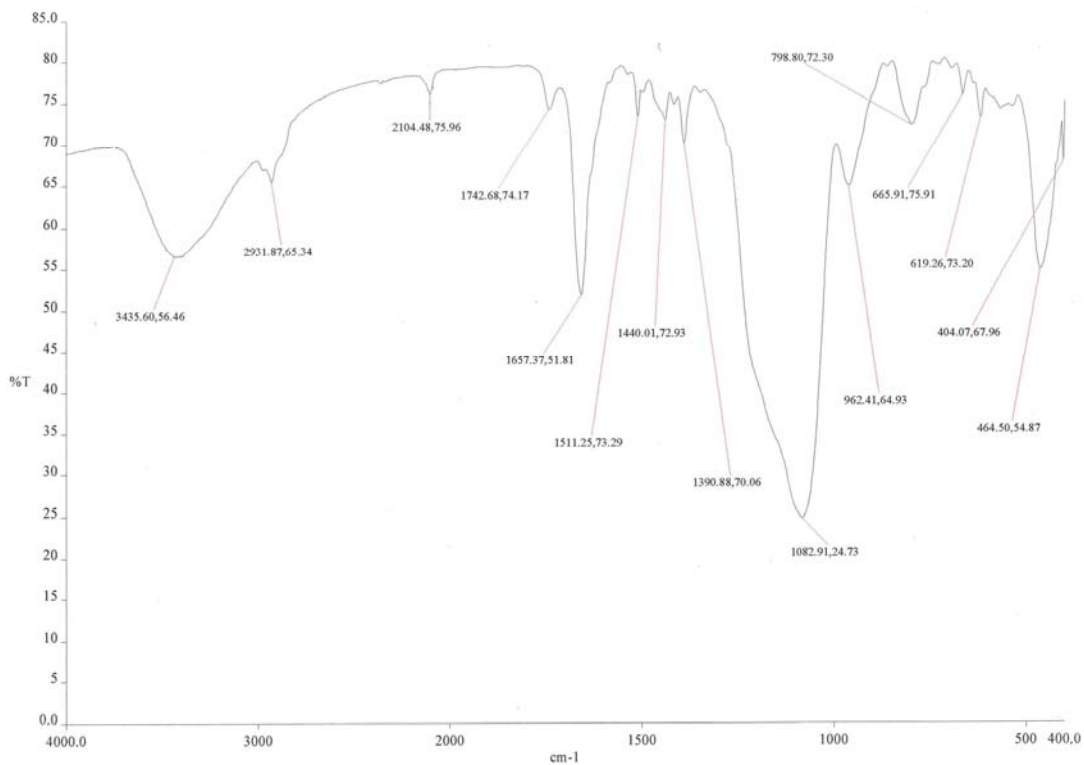

Supplement: c0dt00208a.pdf [file c0dt00208a.pdf]
